# Supplementary material for: The Risks and Opportunities of Translating Terrestrial Biodiversity Offsets to the Marine Realm
Source: Oxford University Press journal article supplement (doi:10.1093/biosci/bix150), 2017-11-20
Supplement: bix150_supp.doc [file bix150_supp.doc]

Supplementary 1

**Methods**

We undertook a comprehensive review of marine-related biodiversity offsets in Scopus using the search terms “marine” AND “offset” OR “biodiversity offset" OR "mitigation banking" OR "habitat mitigation" OR "no net loss". Habitats were considered marine if there was any salt-water incursion, so both intertidal and mangrove habitats were considered marine for the purposes of this study. The search returned 191 articles, and of those, 84 peer-reviewed articles were on the broad subject of offsets or mitigation in these environments. Based on this literature review and the broader literature on biodiversity offsets, marine ecology and conservation, we compared the potentially important differences between the ecology and governance of terrestrial and marine ecosystems. In each case, we considered how those differences might influence the translation of offsetting to the marine environment.

We then sought to identify the extent to which existing policies and those under development allowed for marine offsets. Publications from the literature review were screened for mentions of countries with compensatory policies in place or under development that enable the use of offsets in the marine environment. Relevant information about these policies was then obtained through directed web searches. This information was compiled in a database and mapped to show marine offset locations worldwide.
